# Supplementary material
Source: HighWire-hosted journal article supplement (https://jech.bmj.com/content/72/1/54)
Supplement: inline-supplementary-material-1 [file inline-supplementary-material-1.pdf]

## ANNEX 1

### Alcohol Control Policies

#### **Policies on Leadership Awareness and Commitment**

Adoption of a Written National Alcohol Control Policy

Is an alcohol beverage legally defined?

#### **Policies aimed at reducing the public health impact of illicit alcohol and informally produced alcohol**

Is there legislation on control of illegal alcohol production and distribution

#### **Policies on Marketing of Alcoholic Beverages**

##### Advertising

0-3 Scale: 0 "Voluntary/No Restriction"; 1 "Partial Restriction"; 2 "Partial restriction Time, Place and Content" ; 3 "Ban"

Advertising restrictions on national television

Advertising restrictions on cable television

Advertising restrictions on national radio

Advertising restrictions on local radio

Advertising restrictions in print media

Advertising restrictions at cinemas

Advertising restrictions on billboards

Advertising restrictions at point-of-sale

Advertising restrictions on the internet

Advertising restrictions on social media

##### Product placement

0-3 Scale: 0 "Voluntary/No Restriction"; 1 "Partial Restriction"; 2 "Partial restriction Time, Place and Content" ; 3 "Ban"

Restrictions on product placement on national television

Restrictions on product placement on cable television

Restrictions on product placement in films/movies

##### Sponsorship

Sporting events

Youth events

##### Sales promotion

Owners of pubs and bars

Producers

Retailers

Warning and consumer information labels  
Health warning labels on alcohol advertising  
Health warning labels on alcohol containers  
Consumer information  
Number of standard alcoholic drinks  
Alcohol content

## **Policies on Availability of Alcohol**

Age limits  
Alcohol service/sales  
Compliance

Selling off-premise  
Days  
Hours  
Outlet density  
Places  
Specific events  
Petrol stations

Selling on-premise  
Days  
Hours  
Outlet density  
Places  
Specific events  
Intoxicated persons

Monopolies  
Production  
Retail sales

Licensing requirements  
Production  
Retail sales

Use in public places  
Restrictions on alcohol use

## **Community action**

0-1 Scale 0 "No"; 1 "Yes"

Government support for community action  
Interventions involving stakeholders  
National guidelines for implementation  
Involvement of young people

## **Drink-driving policies and countermeasures**

### Drink driving

Legal BAC limits 0-3 Scale 0 "No BAC Limit" 1 "Limit above the median" 2 "Limit equal or below median" 3 "Zero tolerance and bans"

Penalties for drink driving 0-1 Scale "0" No "1" Yes

Random breath testing 0-1 Scale "0" No "1" Yes

Sobriety checkpoints 0-1 Scale "0" No "1" Yes

### Monitoring and Surveillance

#### Marketing

Detection of infringements

Penalties for infringements

### Pricing Policies

#### Price measures

Average prices

Price measures

#### Taxation measures

Excise tax on alcoholic beverages

Excise tax, % of retail price

Excise tax, for 1 litre of pure alcohol

Adjustment for inflation

Duty paid or excise stamp

New types of alcoholic beverages

Value-added tax (VAT) on alcohol
