# Supplementary material
Source: HighWire-hosted journal article supplement (https://jech.bmj.com/content/72/1/54)
Supplement: inline-supplementary-material-2 [file inline-supplementary-material-2.pdf]

Supplementary Materials

Table 1. Results of the sensitivity analysis by world region

Table 1.1. Caribbean

| Country                          | Ranks    |        |           | Scores   |        |               |
|----------------------------------|----------|--------|-----------|----------|--------|---------------|
|                                  | Baseline | Median | Range     | Baseline | Median | Range         |
| Caribbean                        |          |        |           |          |        |               |
| Antigua e Barbuda                | 2        | 2      | [2-4]     | 3.4      | 3      | [1.5-10.9]    |
| Dominica                         | 11       | 11     | [4-17]    | 12.5     | 13.1   | [11.3-20.6]   |
| Barbados                         | 11       | 9.5    | [6-12]    | 12.5     | 13.6   | [9.4-17.4]    |
| Saint Lucia                      | 14       | 15.5   | [10-25]   | 14.8     | 16.4   | [14.8-26.9]   |
| Saint Vincent and the Grenadines | 24       | 19     | [13-24]   | 19.3     | 19.4   | [16.8-23.2]   |
| Jamaica                          | 28       | 34.5   | [21-40]   | 20.5     | 24.3   | [20.5-32.1]   |
| Grenada                          | 31.5     | 25     | [12-31.5] | 21.6     | 21.5   | [16.7-24.8]   |
| Dominican Republic               | 45.5     | 45.75  | [34-61]   | 26.1     | 30.2   | [24.9-35.6]   |
| Trinidad and Tobago              | 54       | 54     | [45-80]   | 28.4     | 29.6   | [27.9-44.3]   |
| Saint Kitts and Nevis            | 60       | 53.5   | [44-64]   | 30.7     | 31.8   | [29.0-34.8]   |
| Bahamas                          | 129      | 128    | [93-138]  | 63.6     | 59     | [52.7-67.4]   |
| Cuba                             | 165      | 165    | [164-175] | 94.3     | 94.1   | [92.11-98.14] |

Table 1.2. Caucasus

| Country      | Ranks    |        |             | Scores   |        |              |
|--------------|----------|--------|-------------|----------|--------|--------------|
|              | Baseline | Median | Range       | Baseline | Median | Range        |
| Armenia      | 68.5     | 70.75  | [63-114]    | 33       | 35     | [28.9-59.4]  |
| Georgia      | 100      | 90     | [60-100]    | 51.1     | 45.7   | [38.2-51.1]  |
| Kazakhstan   | 106.5    | 111.5  | [98-124]    | 53.4     | 55.7   | [43.1-62.9]  |
| Azerbaijan   | 119      | 115    | [107-120]   | 60.2     | 55.8   | [48.1-60.7]  |
| Tajikistan   | 121.5    | 139.5  | [121.5-160] | 61.3     | 67.1   | [61.4-78.8]  |
| Kyrgyzstan   | 124.5    | 117    | [80-134]    | 62.5     | 52.8   | [47.9-65.6]  |
| Turkmenistan | 164      | 165    | [164-172]   | 93.2     | 92.7   | [92.04-95.6] |
| Uzbekistan   | 166      | 167    | [166-176]   | 95.5     | 96.7   | [94.4-100.0] |

Table 1.4. Eastern Asia

| Country  | Ranks    |        |           | Scores   |        |             |
|----------|----------|--------|-----------|----------|--------|-------------|
|          | Baseline | Median | Range     | Baseline | Median | Range       |
| Korea    | 72       | 77     | [67.5-87] | 34.1     | 39.8   | [34.1-46.8] |
| China    | 98       | 85     | [68-102]  | 50       | 44.4   | [34.9-55.9] |
| Mongolia | 147.5    | 150.25 | [90-154]  | 77.3     | 77.2   | [51.9-78.4] |

Table 1.5. North Africa

| Country | Ranks    |        |           | Scores   |        |             |
|---------|----------|--------|-----------|----------|--------|-------------|
|         | Baseline | Median | Range     | Baseline | Median | Range       |
| Egypt   | 161      | 161    | [158-163] | 83.5     | 84     | [78.4-90.7] |
| Algeria | 162      | 162    | [162-177] | 89.8     | 86.5   | [85.2-100]  |
| Tunisia | 167      | 167    | [164-169] | 97.2     | 96.8   | [85.9-100]  |

Table 1.7. Oceania

| Country          | Ranks    |        |          | Scores   |        |              |
|------------------|----------|--------|----------|----------|--------|--------------|
|                  | Baseline | Median | Range    | Baseline | Median | Range        |
| Kiribati         | 49       | 46.5   | [43-73]  | 26.7     | 28.45  | [24.7-42.8]  |
| Palau            | 55       | 55.5   | [41-76]  | 28.9     | 29.9   | [26.7-43.3]  |
| Fiji             | 60       | 62.5   | [55-72]  | 30.7     | 33.4   | [29.6-42.2]  |
| Tonga            | 76.5     | 76.75  | [66-143] | 36.4     | 37.4   | [30.9-71.1]  |
| Samoa            | 79       | 79     | [68-131] | 37.5     | 38.2   | [32.3-64.6]  |
| Papua New Guinea | 95       | 98     | [50-110] | 48.9     | 46.6   | [35.3- 52.5] |
| Tuvalu           | 96       | 97.5   | [59-101] | 49.4     | 16.4   | [37.3-51.5]  |
| Micronesia       | 113      | 81.5   | [47-113] | 55.1     | 40     | [34.4-55.1]  |

Table 1.8. Southern Asia

| Southern Asia<br>Country | Ranks    |        |           | Scores   |        |             |
|--------------------------|----------|--------|-----------|----------|--------|-------------|
|                          | Baseline | Median | Range     | Baseline | Median | Range       |
| Nepal                    | 124.5    | 128.75 | [78-137]  | 62.5     | 61.3   | [43.6-67.2] |
| Bhutan                   | 137      | 133.5  | [95-144]  | 68.2     | 65.2   | [53.4-68.2] |
| Pakistan                 | 150.5    | 155.5  | [143-158] | 78.4     | 78.3   | [73.7-80.3] |
| Sri Lanka                | 156.5    | 157.75 | [119-161] | 81.8     | 81.2   | [62.1-84.9] |
| India                    | 156.5    | 154.25 | [147-165] | 81.8     | 78.3   | [68.3-82.9] |
| Bangladesh               | 168      | 166.5  | [161-168] | 100      | 98.6   | [82.7-100]  |

Table 1.9 South Eastern Asia

| South-eastern Asia<br>Country | Ranks    |        |             | Scores   |        |             |
|-------------------------------|----------|--------|-------------|----------|--------|-------------|
|                               | Baseline | Median | Range       | Baseline | Median | Range       |
| Lao                           | 17       | 24.5   | [17-35]     | 15.9     | 22.2   | [15.9-30.6] |
| Timor-Leste                   | 24       | 17     | [11-24]     | 19.3     | 19.1   | [16.4-22.6] |
| Cambodia                      | 28       | 27.5   | [10-32]     | 20.5     | 21.1   | [18.8-24.6] |
| Singapore                     | 35.5     | 35.25  | [26-61]     | 22.7     | 24.3   | [21.8-38.4] |
| Philippines                   | 51.5     | 49.75  | [39-62]     | 27.3     | 30.9   | [26.3-34.0] |
| Vietnam                       | 68.5     | 76.5   | [68.5-90]   | 33       | 38     | [33.0-49.3] |
| Malaysia                      | 111      | 108.5  | [87-115]    | 54.5     | 50     | [48.5-54.5] |
| Myanmar                       | 119      | 119    | [110-129]   | 60.2     | 58.8   | [55.6-60.6] |
| Indonesia                     | 147.5    | 156    | [147.5-157] | 77.3     | 78.4   | [75.7-82]   |
| Thailand                      | 159.5    | 151.5  | [147-161]   | 83       | 75     | [70-86.5]   |

Table 1.10 Western Asia

| Western Asia<br>Country | Ranks    |        |             | Scores   |        |             |
|-------------------------|----------|--------|-------------|----------|--------|-------------|
|                         | Baseline | Median | Range       | Baseline | Median | Range       |
| Iraq                    | 45.5     | 42     | [31-45.5]   | 26.1     | 27.4   | [23.4-33.5] |
| Syria                   | 80.5     | 75.25  | [3-89]      | 38.6     | 37.2   | [10.7-41.8] |
| Jordan                  | 142.5    | 135.5  | [70-151]    | 72.7     | 68.4   | [44.1-73.8] |
| Oman                    | 145      | 142.5  | [78-153]    | 76.1     | 70.2   | [47.0-76.1] |
| Turkey                  | 147.5    | 144    | [120-147.5] | 77.3     | 69.8   | [62.2-77.3] |
