# Supplementary material
Source: HighWire-hosted journal article supplement (https://jech.bmj.com/content/72/1/54)

ACPI - 5 Approaches to Calculation  
Latin America

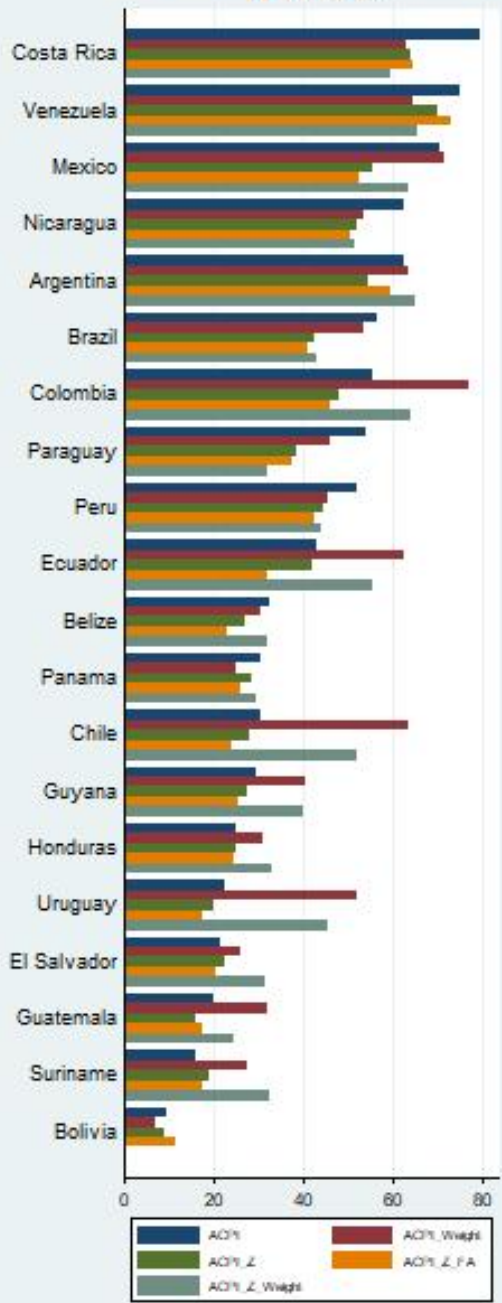

Supplement: inline-supplementary-material-3 [file inline-supplementary-material-3.pdf]
